# Supplementary material for: Spin density distribution after electron transfer from triethylamine to an [Ir(ppy)2(bpy)]+ photosensitizer during photocatalytic water reduction
Source: Royal Society of Chemistry journal article supplement (doi:10.1039/c3cp54922d), 2014-01-01
Supplement: c3cp54922d.pdf [file c3cp54922d.pdf]

# Spin Density Distribution after Electron Transfer from Triethylamine to an $[\text{Ir}(\text{ppy})_2(\text{bpy})]^+$ Photosensitizer during Photocatalytic Water Reduction

Sergey I. Bokarev,\* Dirk Hollmann, Alexandra Pazidis, Antje Neubauer, Jörg Radnik, Oliver Kühn, Stefan Lochbrunner, Henrik Junge, Matthias Beller, and Angelika Brückner\*

The photoreduction of the bis(2-phenylpyridinato-)(2,2'-bipyridine)iridium(III) ion ( $[\text{Ir}(\text{ppy})_2(\text{bpy})]^+$ ), used as photosensitizer in photocatalytic water splitting, by triethylamine was studied by means of UV/VIS, XANES, and EPR spectroscopies, supported by theoretical calculations on density functional theory (DFT) and complete active space self-consistent field (CASSCF/CASPT2) levels. The combination of these methods suggests a predominant *bpy* localization of the spin-density of the unpaired electron with notable delocalization to the Ir center. This is particularly evident from EPR and theoretical results and leads to broad EPR lines and a large anisotropy of the *g*-factor.

## Supplementary Material

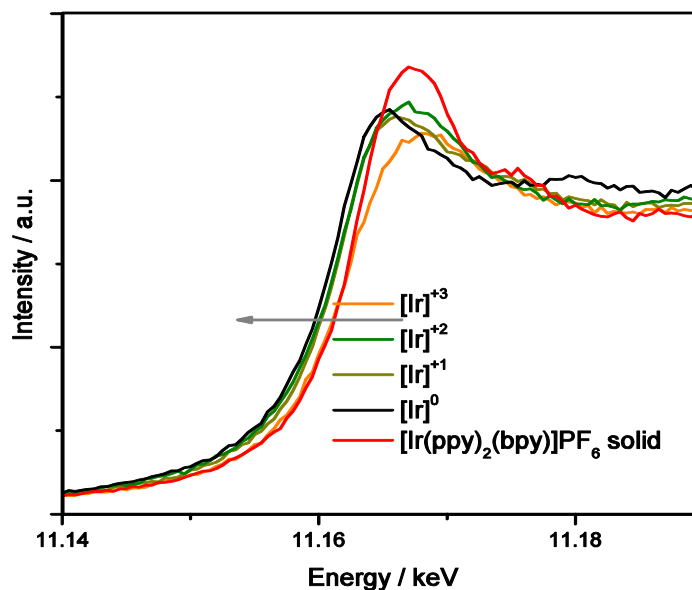

Figure S1. XANES measurements of  $[\text{Ir}]^{+3}$  ( $[\text{Ir}(\text{H}_2)(\text{TFP})(\text{P}i\text{Pr}_3)_2]$ ),  $[\text{Ir}]^{+2}$  ( $[\text{Ir}(\text{Cl})\{\mu_{\text{es}}\text{-Diimin}\}(\text{CN}t\text{Bu})]$ ),  $[\text{Ir}]^{+1}$  ( $[\text{Ir}(\mu\text{-Cl})(\text{COOEt})_2]_2$ ) and  $[\text{Ir}]^0$  (iridium foil) and the sample ( $[\text{Ir}(\text{ppy})_2(\text{bpy})]\text{PF}_6$ ).

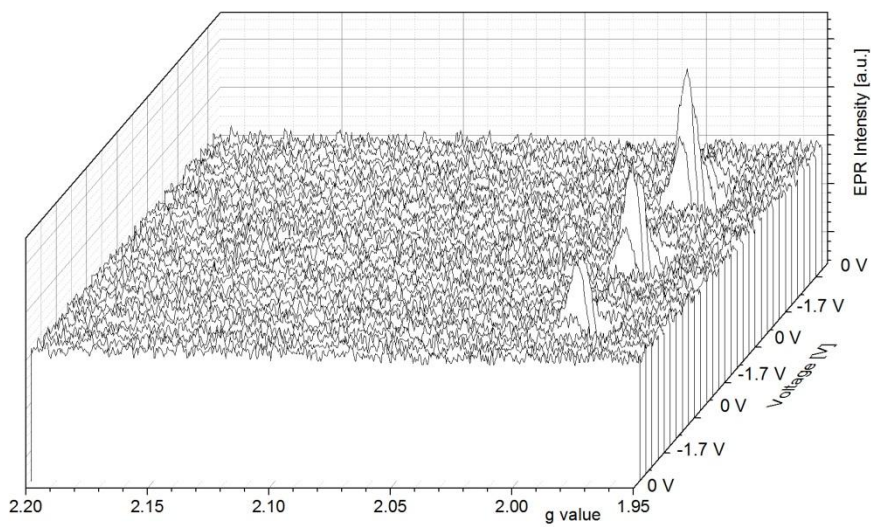

Figure S2. In situ EPR spectroelectrochemistry performed by Cyclovoltametrie (0 to -1.7V) combined with EPR spectroscopy for IrPS.

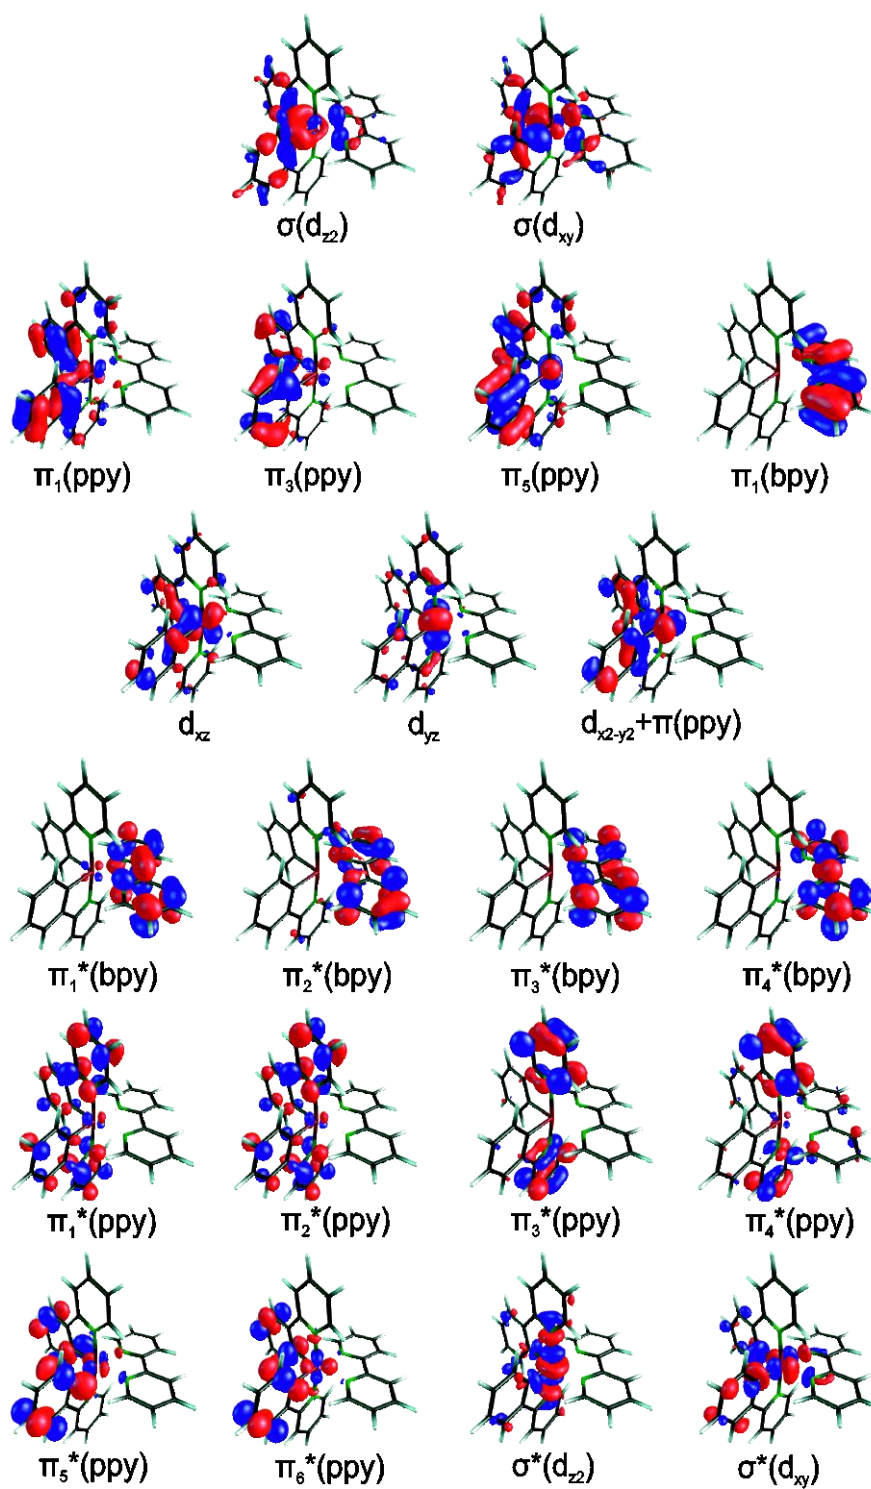

Figure S3. MOs most important for electronic spectrum.

Table S1. Vertical electronic transitions of  $[\text{Ir}(\text{ppy})_2(\text{bpy})]^0$  as predicted by TDDFT (LC-BLYP,  $\omega=0.18 \text{ bohr}^{-1}$ ) in THF (PCM).

| State nr. | Energy / $\text{cm}^{-1}$ | Osc. str. | Configuration                                                                                                                                                                                                                                                                       | Weight                               |
|-----------|---------------------------|-----------|-------------------------------------------------------------------------------------------------------------------------------------------------------------------------------------------------------------------------------------------------------------------------------------|--------------------------------------|
| 1         | 10893                     | 0.005     | $\pi 1^*(\text{bpy}) \rightarrow \pi 2^*(\text{bpy})$                                                                                                                                                                                                                               | 0.45                                 |
| 2         | 11492                     | 0.000     | $\pi 1^*(\text{bpy}) \rightarrow \pi 1^*(\text{ppy})$                                                                                                                                                                                                                               | 0.75                                 |
| 3         | 11921                     | 0.002     | $\pi 1^*(\text{bpy}) \rightarrow \pi 2^*(\text{ppy})$                                                                                                                                                                                                                               | 0.94                                 |
| 4         | 12907                     | 0.026     | $\pi 1^*(\text{bpy}) \rightarrow \pi 3^*(\text{bpy})$                                                                                                                                                                                                                               | 0.94                                 |
| 5         | 16421                     | 0.002     | $\pi 1^*(\text{bpy}) \rightarrow \pi 3^*(\text{ppy})$                                                                                                                                                                                                                               | 0.63                                 |
| 6         | 16744                     | 0.000     | $\pi 1^*(\text{bpy}) \rightarrow \pi 4^*(\text{ppy})$                                                                                                                                                                                                                               | 0.94                                 |
| 7         | 22294                     | 0.000     | $\text{dx}2\text{-}\gamma 2 \rightarrow \pi 1^*(\text{ppy})$                                                                                                                                                                                                                        | 0.38                                 |
| 8         | 22604                     | 0.108     | $\pi 1^*(\text{bpy}) \rightarrow \pi 4^*(\text{bpy})$                                                                                                                                                                                                                               | 0.67                                 |
| 9         | 22790                     | 0.000     | $\text{dx}2\text{-}\gamma 2 \rightarrow \pi 1^*(\text{ppy})$                                                                                                                                                                                                                        | 0.35                                 |
| 10        | 24742                     | 0.052     | $\text{dx}2\text{-}\gamma 2 \rightarrow \pi 1^*(\text{ppy})$                                                                                                                                                                                                                        | 0.47                                 |
| 11        | 25705                     | 0.002     | $\text{dx}2\text{-}\gamma 2 \rightarrow \pi 2^*(\text{ppy})$                                                                                                                                                                                                                        | 0.49                                 |
| 12        | 25904                     | 0.000     | $\text{d}yz \rightarrow \pi 2^*(\text{ppy})$<br>$\text{dx}z \rightarrow \pi 1^*(\text{bpy})$<br>$\text{dx}z \rightarrow \pi 1^*(\text{ppy})$                                                                                                                                        | 0.16<br>0.16<br>0.14                 |
| 13        | 25940                     | 0.001     | $\text{d}yz \rightarrow \pi 1^*(\text{ppy})$<br>$\text{d}yz \rightarrow \pi 1^*(\text{bpy})$                                                                                                                                                                                        | 0.2<br>0.15                          |
| 14        | 26116                     | 0.001     | $\pi 1^*(\text{bpy}) \rightarrow \sigma^*(\text{dz}2)$                                                                                                                                                                                                                              | 0.56                                 |
| 15        | 26779                     | 0.000     | $\pi 1^*(\text{bpy}) \rightarrow \pi 5^*(\text{ppy})$                                                                                                                                                                                                                               | 0.76                                 |
| 16        | 27033                     | 0.061     | $\text{dx}2\text{-}\gamma 2 \rightarrow \pi 2^*(\text{ppy})$                                                                                                                                                                                                                        | 0.44                                 |
| 17        | 27920                     | 0.003     | $\text{d}yz \rightarrow \pi 1^*(\text{bpy})$<br>$\text{dx}2\text{-}\gamma 2 \rightarrow \pi 3^*(\text{ppy})$<br>$\text{dx}2\text{-}\gamma 2 \rightarrow \pi 3^*(\text{ppy})$                                                                                                        | 0.15<br>0.15<br>0.14                 |
| 18        | 28129                     | 0.000     | $\text{d}yz \rightarrow \pi 1^*(\text{ppy})$<br>$\text{d}yz \rightarrow \pi 2^*(\text{ppy})$<br>$\pi 1(\text{bpy}) \rightarrow \pi 1^*(\text{ppy})$<br>$\text{dx}2\text{-}\gamma 2 \rightarrow \pi 4^*(\text{ppy})$<br>$\text{dx}2\text{-}\gamma 2 \rightarrow \pi 4^*(\text{ppy})$ | 0.16<br>0.15<br>0.08<br>0.06<br>0.06 |
| 19        | 28462                     | 0.056     | $\text{dx}2\text{-}\gamma 2 \rightarrow \pi 2^*(\text{ppy})$<br>$\text{d}yz \rightarrow \pi 1^*(\text{bpy})$                                                                                                                                                                        | 0.2<br>0.18                          |
| 20        | 28466                     | 0.038     | $\text{d}yz \rightarrow \pi 2^*(\text{ppy})$<br>$\text{dx}2\text{-}\gamma 2 \rightarrow \pi 2^*(\text{ppy})$<br>$\text{d}yz \rightarrow \pi 1^*(\text{ppy})$<br>$\text{dx}2\text{-}\gamma 2 \rightarrow \pi 3^*(\text{ppy})$                                                        | 0.13<br>0.12<br>0.11<br>0.1          |
| 21        | 29118                     | 0.008     | $\text{dx}z \rightarrow \pi 1^*(\text{bpy})$<br>$\text{dx}2\text{-}\gamma 2 \rightarrow \pi 4^*(\text{ppy})$                                                                                                                                                                        | 0.34<br>0.16                         |
| 22        | 29166                     | 0.057     | $\text{d}yz \rightarrow \pi 1^*(\text{ppy})$                                                                                                                                                                                                                                        | 0.31                                 |
| 23        | 29272                     | 0.011     | $\pi 1^*(\text{bpy}) \rightarrow \text{diff}$                                                                                                                                                                                                                                       | 0.46                                 |
| 24        | 29317                     | 0.006     | $\pi 1^*(\text{bpy}) \rightarrow \text{diff}$<br>$\text{dx}z \rightarrow \pi 1^*(\text{bpy})$                                                                                                                                                                                       | 0.22<br>0.17                         |

|    |       |       |                                                                                                                                                                                                                                                                                                        |                                                             |
|----|-------|-------|--------------------------------------------------------------------------------------------------------------------------------------------------------------------------------------------------------------------------------------------------------------------------------------------------------|-------------------------------------------------------------|
|    |       |       | $dx^2-y^2 \rightarrow \pi^4^*(ppy)$                                                                                                                                                                                                                                                                    | 0.09                                                        |
| 25 | 29498 | 0.004 | $\pi^1^*(bpy) \rightarrow \pi^6^*(ppy)$                                                                                                                                                                                                                                                                | 0.52                                                        |
| 26 | 29609 | 0.047 | $dxz \rightarrow \pi^2^*(ppy)$                                                                                                                                                                                                                                                                         | 0.45                                                        |
| 27 | 29713 | 0.014 | $dxz \rightarrow \pi^1^*(ppy)$<br>$\pi^1^*(bpy) \rightarrow \pi^6^*(ppy)$                                                                                                                                                                                                                              | 0.33<br>0.17                                                |
| 28 | 30017 | 0.000 | $dyz \rightarrow \pi^2^*(ppy)$                                                                                                                                                                                                                                                                         | 0.44                                                        |
| 29 | 30232 | 0.019 | $dx^2-y^2 \rightarrow \pi^3^*(ppy)$                                                                                                                                                                                                                                                                    | 0.43                                                        |
| 30 | 30837 | 0.097 | $dxz \rightarrow \pi^2^*(ppy)$                                                                                                                                                                                                                                                                         | 0.53                                                        |
| 31 | 30852 | 0.001 | $dxz \rightarrow \pi^2^*(ppy)$<br>$dxz \rightarrow \pi^1^*(ppy)$                                                                                                                                                                                                                                       | 0.25<br>0.16                                                |
| 32 | 31084 | 0.000 | $\pi^1^*(bpy) \rightarrow \text{diff}$                                                                                                                                                                                                                                                                 | 0.6                                                         |
| 33 | 31202 | 0.001 | $\pi^1^*(bpy) \rightarrow \text{diff}$                                                                                                                                                                                                                                                                 | 0.67                                                        |
| 34 | 31689 | 0.000 | $dx^2-y^2 \rightarrow \pi^4^*(ppy)$                                                                                                                                                                                                                                                                    | 0.34                                                        |
| 35 | 31951 | 0.038 | $dyz \rightarrow \pi^3^*(ppy)$<br>$\pi^1(ppy) \rightarrow \pi^2^*(ppy)$<br>$dyz \rightarrow \pi^3^*(ppy)$<br>$\pi^1(bpy) \rightarrow \pi^3^*(ppy)$                                                                                                                                                     | 0.17<br>0.14<br>0.09<br>0.05                                |
| 36 | 32051 | 0.126 | $\pi^1(ppy) \rightarrow \pi^2^*(ppy)$                                                                                                                                                                                                                                                                  | 0.5                                                         |
| 37 | 32269 | 0.002 | $dyz \rightarrow \pi^3^*(ppy)$<br>$dyz \rightarrow \pi^3^*(ppy)$<br>$\pi^1(bpy)+\pi^5(ppy) \rightarrow \pi^1^*(ppy)$<br>$\pi^1(ppy) \rightarrow \pi^2^*(ppy)$                                                                                                                                          | 0.12<br>0.11<br>0.11<br>0.11                                |
| 38 | 32339 | 0.000 | $\pi^1(ppy) \rightarrow \pi^1^*(ppy)$<br>$\pi^1(bpy)+\pi^5(ppy) \rightarrow \pi^1^*(bpy)$<br>$dxz \rightarrow \pi^3^*(ppy)$<br>$dxz \rightarrow \pi^3^*(ppy)$                                                                                                                                          | 0.13<br>0.12<br>0.12<br>0.07                                |
| 39 | 32494 | 0.000 | $dyz \rightarrow \pi^4^*(ppy)$<br>$dyz \rightarrow \pi^4^*(ppy)$<br>$dxz \rightarrow \pi^3^*(ppy)$<br>$\pi^1(bpy) \rightarrow \pi^4^*(ppy)$<br>$dxz \rightarrow \pi^3^*(ppy)$<br>$dx^2-y^2 \rightarrow \pi^6^*(ppy)$<br>$\pi^3(ppy) \rightarrow \pi^3^*(ppy)$<br>$\pi^3(ppy) \rightarrow \pi^3^*(ppy)$ | 0.1<br>0.09<br>0.09<br>0.05<br>0.04<br>0.03<br>0.03<br>0.03 |
| 40 | 33176 | 0.009 | $\pi^1^*(bpy) \rightarrow \pi^7^*(ppy)$                                                                                                                                                                                                                                                                | 0.55                                                        |
| 41 | 33294 | 0.001 | $\pi^1^*(bpy) \rightarrow \pi^8^*(ppy)$                                                                                                                                                                                                                                                                | 0.65                                                        |
| 42 | 33560 | 0.002 | $dyz \rightarrow \pi^3^*(ppy)$<br>$dyz \rightarrow \pi^3^*(ppy)$                                                                                                                                                                                                                                       | 0.28<br>0.21                                                |
| 43 | 33665 | 0.000 | $dx^2-y^2 \rightarrow \pi^6^*(ppy)$<br>$dx^2-y^2 \rightarrow \pi^6^*(ppy)$<br>$\pi^3(ppy) \rightarrow \pi^1^*(ppy)$<br>$\pi^1(bpy)+\pi^5(ppy) \rightarrow \pi^5^*(ppy)$                                                                                                                                | 0.18<br>0.16<br>0.06<br>0.06                                |
| 44 | 33762 | 0.011 | $dyz \rightarrow \pi^2^*(bpy)$<br>$\pi^1(ppy) \rightarrow \pi^2^*(bpy)$                                                                                                                                                                                                                                | 0.14<br>0.12                                                |

|    |       |       |                                                                                                                                                                                                                                                                                                                                                                                           |                                                      |
|----|-------|-------|-------------------------------------------------------------------------------------------------------------------------------------------------------------------------------------------------------------------------------------------------------------------------------------------------------------------------------------------------------------------------------------------|------------------------------------------------------|
|    |       |       | $\pi 1(\text{ppy}) \rightarrow \pi 3^*(\text{ppy})$<br>$\text{d}yz \rightarrow \pi 3^*(\text{ppy})$                                                                                                                                                                                                                                                                                       | 0.12<br>0.1                                          |
| 45 | 33883 | 0.031 | $\pi 1(\text{ppy}) \rightarrow \pi 1^*(\text{ppy})$<br>$\text{d}xz \rightarrow \pi 3^*(\text{ppy})$<br>$\text{d}yz \rightarrow \pi 4^*(\text{ppy})$                                                                                                                                                                                                                                       | 0.21<br>0.14<br>0.13                                 |
| 46 | 34110 | 0.000 | $\text{d}x^2-\text{y}^2 \rightarrow \pi 5^*(\text{ppy})$<br>$\text{d}x^2-\text{y}^2 \rightarrow \pi 5^*(\text{ppy})$<br>$\pi 1(\text{ppy}) \rightarrow \pi 2^*(\text{ppy})$<br>$\pi 3(\text{ppy}) \rightarrow \pi 1^*(\text{ppy})$                                                                                                                                                        | 0.16<br>0.16<br>0.07<br>0.07                         |
| 47 | 34312 | 0.003 | $\text{d}xz \rightarrow \pi 3^*(\text{ppy})$<br>$\text{d}xz \rightarrow \pi 3^*(\text{ppy})$<br>$\text{d}yz \rightarrow \pi 4^*(\text{ppy})$                                                                                                                                                                                                                                              | 0.2<br>0.12<br>0.1                                   |
| 48 | 34782 | 0.001 | $\pi 1^*(\text{bpy}) \rightarrow \sigma^*(\text{dxy})$                                                                                                                                                                                                                                                                                                                                    | 0.51                                                 |
| 49 | 34796 | 0.003 | $\text{d}xz \rightarrow \pi 4^*(\text{ppy})$<br>$\text{d}xz \rightarrow \pi 4^*(\text{ppy})$<br>$\text{d}x^2-\text{y}^2 \rightarrow \pi 3^*(\text{ppy})$<br>$\pi 1(\text{ppy}) \rightarrow \pi 2^*(\text{ppy})$                                                                                                                                                                           | 0.29<br>0.07<br>0.06<br>0.05                         |
| 50 | 35146 | 0.103 | $\text{d}yz \rightarrow \pi 3^*(\text{ppy})$<br>$\pi 1(\text{bpy})+\pi 5(\text{ppy}) \rightarrow \pi 1^*(\text{ppy})$<br>$\text{d}xz \rightarrow \pi 4^*(\text{ppy})$                                                                                                                                                                                                                     | 0.18<br>0.17<br>0.14                                 |
| 51 | 35174 | 0.006 | $\text{d}yz \rightarrow \pi 4^*(\text{ppy})$<br>$\pi 1(\text{ppy}) \rightarrow \pi 3^*(\text{bpy})$<br>$\text{d}xz \rightarrow \pi 3^*(\text{ppy})$<br>$\text{d}x^2-\text{y}^2 \rightarrow \pi 4^*(\text{ppy})$<br>$\pi 1(\text{bpy}) \rightarrow \pi 3^*(\text{bpy})$<br>$\text{d}x^2-\text{y}^2 \rightarrow \pi 4^*(\text{ppy})$<br>$\pi 1(\text{ppy}) \rightarrow \pi 4^*(\text{ppy})$ | 0.17<br>0.07<br>0.06<br>0.04<br>0.04<br>0.04<br>0.03 |
| 52 | 35191 | 0.001 | $\text{d}xz \rightarrow \pi 3^*(\text{ppy})$<br>$\text{d}xz \rightarrow \pi 3^*(\text{ppy})$<br>$\text{d}yz \rightarrow \pi 3^*(\text{bpy})$                                                                                                                                                                                                                                              | 0.18<br>0.15<br>0.1                                  |
| 53 | 35500 | 0.008 | $\text{d}xz \rightarrow \pi 3^*(\text{ppy})$<br>$\text{d}yz \rightarrow \pi 3^*(\text{bpy})$<br>$\text{d}yz \rightarrow \pi 3^*(\text{bpy})$<br>$\pi 1(\text{bpy})+\pi 5(\text{ppy}) \rightarrow \pi 1^*(\text{bpy})$                                                                                                                                                                     | 0.15<br>0.13<br>0.1<br>0.08                          |
| 54 | 35517 | 0.060 | $\text{d}yz \rightarrow \pi 3^*(\text{ppy})$<br>$\text{d}xz \rightarrow \pi 4^*(\text{ppy})$<br>$\pi 1(\text{ppy}) \rightarrow \pi 2^*(\text{ppy})$                                                                                                                                                                                                                                       | 0.17<br>0.13<br>0.12                                 |
| 55 | 35676 | 0.010 | $\text{d}yz \rightarrow \pi 4^*(\text{ppy})$                                                                                                                                                                                                                                                                                                                                              | 0.43                                                 |
| 56 | 36080 | 0.059 | $\text{d}x^2-\text{y}^2 \rightarrow \pi 2^*(\text{bpy})$<br>$\text{d}xz \rightarrow \pi 4^*(\text{ppy})$                                                                                                                                                                                                                                                                                  | 0.33<br>0.12                                         |
| 57 | 36144 | 0.001 | $\text{d}yz \rightarrow \pi 4^*(\text{ppy})$<br>$\text{d}xz \rightarrow \pi 3^*(\text{ppy})$<br>$\text{d}xz \rightarrow \pi 2^*(\text{bpy})$<br>$\text{d}x^2-\text{y}^2 \rightarrow \pi 3^*(\text{bpy})$                                                                                                                                                                                  | 0.11<br>0.09<br>0.09<br>0.08                         |

|    |       |       |                                                                                                                                                                                                                                                                                                                                                                                                                 |                                                                              |
|----|-------|-------|-----------------------------------------------------------------------------------------------------------------------------------------------------------------------------------------------------------------------------------------------------------------------------------------------------------------------------------------------------------------------------------------------------------------|------------------------------------------------------------------------------|
|    |       |       | $dyz \rightarrow \pi 3^*(bpy)$                                                                                                                                                                                                                                                                                                                                                                                  | 0.07                                                                         |
| 58 | 36449 | 0.098 | $dxz \rightarrow \pi 4^*(ppy)$<br>$\pi 1(ppp) \rightarrow \pi 2^*(ppy)$                                                                                                                                                                                                                                                                                                                                         | 0.36<br>0.12                                                                 |
| 59 | 36840 | 0.055 | $dx^2-y^2 \rightarrow \pi 2^*(bpy)$                                                                                                                                                                                                                                                                                                                                                                             | 0.42                                                                         |
| 60 | 36860 | 0.080 | $\pi 3(ppp) \rightarrow \pi 1^*(bpy)$<br>$\pi 3(ppp) \rightarrow \pi 1^*(ppy)$<br>$\pi 1(ppp) \rightarrow \pi 1^*(ppy)$                                                                                                                                                                                                                                                                                         | 0.19<br>0.19<br>0.09                                                         |
| 61 | 36916 | 0.074 | $\pi 1(ppp) \rightarrow \pi 1^*(bpy)$<br>$dyz \rightarrow \pi 1^*(bpy)$<br>$\pi 1(ppp) \rightarrow \pi 2^*(ppy)$                                                                                                                                                                                                                                                                                                | 0.34<br>0.08<br>0.07                                                         |
| 62 | 37125 | 0.000 | $dx^2-y^2 \rightarrow \sigma^*(dz^2)$<br>$dx^2-y^2 \rightarrow \sigma^*(dz^2)$                                                                                                                                                                                                                                                                                                                                  | 0.2<br>0.2                                                                   |
| 63 | 37206 | 0.004 | $dx^2-y^2 \rightarrow \pi 3^*(bpy)$                                                                                                                                                                                                                                                                                                                                                                             | 0.48                                                                         |
| 64 | 37427 | 0.026 | $\pi 6(ppp) \rightarrow \pi 1^*(ppy)$<br>$\pi 6(ppp) \rightarrow \pi 1^*(bpy)$<br>$\pi(lig) \rightarrow \pi 1^*(ppy)$<br>$dx^2-y^2 \rightarrow \pi 5^*(ppy)$<br>$\pi 3(ppp) \rightarrow \pi 2^*(ppy)$<br>$\pi(lig) \rightarrow \pi 2^*(ppy)$<br>$\pi 1(bpy)+\pi 5(ppp) \rightarrow diff$<br>$\pi(bpy) \rightarrow \pi 1^*(bpy)$<br>$\pi 1(ppp) \rightarrow \pi 7^*(ppy)$                                        | 0.07<br>0.06<br>0.06<br>0.06<br>0.04<br>0.04<br>0.03<br>0.03<br>0.03         |
| 65 | 37460 | 0.103 | $\pi 1(ppp) \rightarrow \pi 1^*(bpy)$<br>$\pi 1(bpy) \rightarrow \pi 1^*(bpy)$<br>$dxz \rightarrow \pi 4^*(ppy)$<br>$\pi 3(ppp) \rightarrow \pi 1^*(ppy)$                                                                                                                                                                                                                                                       | 0.19<br>0.08<br>0.06<br>0.05                                                 |
| 66 | 37468 | 0.024 | $dx^2-y^2 \rightarrow \pi 3^*(bpy)$<br>$\pi 1(ppp) \rightarrow \pi 1^*(bpy)$<br>$\pi(lig) \rightarrow \pi 1^*(bpy)$<br>$dx^2-y^2 \rightarrow \pi 3^*(bpy)$<br>$\pi 6(ppp) \rightarrow \pi 2^*(ppy)$<br>$\pi(lig) \rightarrow \pi 1^*(ppy)$<br>$dx^2-y^2 \rightarrow \sigma^*(dz^2)$<br>$\pi 1(ppp) \rightarrow \pi 1^*(ppy)$<br>$\pi 6(ppp) \rightarrow \pi 1^*(ppy)$<br>$\sigma(dxy) \rightarrow \pi 1^*(bpy)$ | 0.13<br>0.04<br>0.03<br>0.03<br>0.03<br>0.02<br>0.02<br>0.02<br>0.02<br>0.02 |
| 67 | 37600 | 0.004 | $\sigma(dxy) \rightarrow \pi 2^*(ppy)$<br>$\pi 1(bpy)+\pi 5(ppp) \rightarrow \pi 2^*(ppy)$                                                                                                                                                                                                                                                                                                                      | 0.25<br>0.22                                                                 |
| 68 | 37635 | 0.015 | $dx^2-y^2 \rightarrow \pi 2^*(bpy)$                                                                                                                                                                                                                                                                                                                                                                             | 0.59                                                                         |
| 69 | 37757 | 0.002 | $\pi 1(ppp) \rightarrow \pi 1^*(ppy)$                                                                                                                                                                                                                                                                                                                                                                           | 0.45                                                                         |
| 70 | 38191 | 0.000 | $\sigma(dxy) \rightarrow \pi 1^*(bpy)$<br>$\sigma(dxy) \rightarrow \pi 1^*(ppy)$<br>$\sigma(dxy) \rightarrow \pi 2^*(ppy)$                                                                                                                                                                                                                                                                                      | 0.16<br>0.16<br>0.07                                                         |
| 71 | 38227 | 0.001 | $\pi 1(ppp) \rightarrow \pi 1^*(ppy)$                                                                                                                                                                                                                                                                                                                                                                           | 0.11                                                                         |

|    |       |       |                                                                         |      |
|----|-------|-------|-------------------------------------------------------------------------|------|
|    |       |       | $\pi_3(\text{bpy}) \rightarrow \pi_2^*(\text{ppy})$                     | 0.11 |
|    |       |       | $\sigma(\text{dxy}) \rightarrow \pi_1^*(\text{bpy})$                    | 0.07 |
|    |       |       | $\sigma(\text{dxy}) \rightarrow \pi_1^*(\text{ppy})$                    | 0.07 |
|    |       |       | $\pi_1^*(\text{bpy}) \rightarrow \text{diff}$                           | 0.05 |
|    |       |       | $\pi_1^*(\text{bpy}) \rightarrow \pi^*(\text{bpy})$                     | 0.04 |
|    |       |       | $\sigma(\text{dxy}) \rightarrow \pi_2^*(\text{ppy})$                    | 0.04 |
| 72 | 38497 | 0.001 | $\pi_1^*(\text{bpy}) \rightarrow \text{diff}$                           | 0.64 |
| 73 | 38565 | 0.001 | $\sigma(\text{dxy}) \rightarrow \pi_1^*(\text{ppy})$                    | 0.26 |
|    |       |       | $\sigma(\text{dxy}) \rightarrow \pi_2^*(\text{ppy})$                    | 0.18 |
| 74 | 38746 | 0.003 | $\text{dx}^2\text{-y}^2 \rightarrow \pi_3^*(\text{bpy})$                | 0.67 |
| 75 | 39082 | 0.069 | $\text{d}_{yz} \rightarrow \pi_2^*(\text{bpy})$                         | 0.36 |
| 76 | 39159 | 0.040 | $\sigma(\text{dxy}) \rightarrow \pi_1^*(\text{ppy})$                    | 0.35 |
| 77 | 39430 | 0.034 | $\sigma(\text{dz}^2) \rightarrow \pi_1^*(\text{ppy})$                   | 0.18 |
|    |       |       | $\sigma(\text{dxy}) \rightarrow \pi_2^*(\text{ppy})$                    | 0.17 |
|    |       |       | $\sigma(\text{dxy}) \rightarrow \pi_1^*(\text{ppy})$                    | 0.12 |
| 78 | 39578 | 0.057 | $\text{d}_{yz} \rightarrow \pi_3^*(\text{bpy})$                         | 0.18 |
|    |       |       | $\text{dxz} \rightarrow \pi_2^*(\text{bpy})$                            | 0.12 |
|    |       |       | $\pi_3(\text{bpy}) \rightarrow \pi_2^*(\text{ppy})$                     | 0.06 |
|    |       |       | $\text{d}_{yz} \rightarrow \sigma^*(\text{dz}^2)$                       | 0.06 |
| 79 | 39683 | 0.038 | $\text{d}_{yz} \rightarrow \sigma^*(\text{dz}^2)$                       | 0.12 |
|    |       |       | $\text{d}_{yz} \rightarrow \pi_3^*(\text{bpy})$                         | 0.11 |
|    |       |       | $\text{d}_{yz} \rightarrow \sigma^*(\text{dz}^2)$                       | 0.11 |
|    |       |       | $\text{d}_{yz} \rightarrow \text{diff}$                                 | 0.07 |
|    |       |       | $\text{d}_{yz} \rightarrow \pi_8^*(\text{ppy})$                         | 0.06 |
| 80 | 39958 | 0.005 | $\pi_1(\text{bpy}) + \pi_5(\text{ppy}) \rightarrow \pi_3^*(\text{ppy})$ | 0.25 |
|    |       |       | $\pi_1(\text{ppy}) \rightarrow \pi_3^*(\text{ppy})$                     | 0.23 |



Table S2. Vertical electronic transitions of  $[\text{Ir}(\text{ppy})_2(\text{bpy})]^+$  as predicted by TDDFT (LC-BLYP,  $\omega=0.18 \text{ bohr}^{-1}$ ) in THF (PCM).

| State nr. | Energy / $\text{cm}^{-1}$ | Osc. str. | Configuration                                                                                                                                          | Weight       |
|-----------|---------------------------|-----------|--------------------------------------------------------------------------------------------------------------------------------------------------------|--------------|
| 1         | 22230                     | 0.001     | $\text{dx}^2\text{-y}^2+\pi(\text{ppy}) \rightarrow \pi 1^*(\text{bpy})$                                                                               | 0.90         |
| 2         | 25844                     | 0.001     | $\text{d}yz \rightarrow \pi 1^*(\text{bpy})$                                                                                                           | 0.86         |
| 3         | 26032                     | 0.071     | $\text{dx}^2\text{-y}^2+\pi(\text{ppy}) \rightarrow \pi 1^*(\text{ppy})$                                                                               | 0.92         |
| 4         | 26967                     | 0.035     | $\text{dx}^2\text{-y}^2+\pi(\text{ppy}) \rightarrow \pi 2^*(\text{ppy})$                                                                               | 0.58         |
| 5         | 27249                     | 0.092     | $\text{dx}^2\text{-y}^2+\pi(\text{ppy}) \rightarrow \pi 2^*(\text{ppy})$                                                                               | 0.32         |
| 6         | 30107                     | 0.010     | $\text{dx}^2\text{-y}^2+\pi(\text{ppy}) \rightarrow \pi 2^*(\text{bpy})$                                                                               | 0.88         |
| 7         | 31419                     | 0.077     | $\text{d}yz \rightarrow \pi 1^*(\text{ppy})$                                                                                                           | 0.86         |
| 8         | 31644                     | 0.006     | $\text{dx}^2\text{-y}^2+\pi(\text{ppy}) \rightarrow \pi 3^*(\text{bpy})$                                                                               | 0.62         |
| 9         | 32073                     | 0.006     | $\text{d}xz+\pi 1(\text{ppy}) \rightarrow \pi 1^*(\text{ppy})$                                                                                         | 0.46         |
| 10        | 32558                     | 0.003     | $\text{d}yz \rightarrow \pi 2^*(\text{ppy})$                                                                                                           | 0.48         |
| 11        | 32699                     | 0.074     | $\text{d}xz+\pi 1(\text{ppy}) \rightarrow \pi 2^*(\text{ppy})$                                                                                         | 0.58         |
| 12        | 32827                     | 0.008     | $\text{d}xz \rightarrow \pi 1^*(\text{bpy})$                                                                                                           | 0.30         |
| 13        | 33017                     | 0.031     | $\text{dx}^2\text{-y}^2+\pi(\text{ppy}) \rightarrow \pi 4^*(\text{ppy})$                                                                               | 0.78         |
| 14        | 33318                     | 0.013     | $\text{dx}^2\text{-y}^2+\pi(\text{ppy}) \rightarrow \pi 3^*(\text{ppy})$                                                                               | 0.38         |
| 15        | 33895                     | 0.012     | $\text{d}yz \rightarrow \pi 2^*(\text{bpy})$                                                                                                           | 0.68         |
| 16        | 34446                     | 0.050     | $\text{d}xz \rightarrow \pi 1^*(\text{ppy})$<br>$\text{d}xz+\pi 1(\text{ppy}) \rightarrow \pi 2^*(\text{bpy})$                                         | 0.36<br>0.16 |
| 17        | 34795                     | 0.063     | $\pi 5(\text{ppy}) \rightarrow \pi 1^*(\text{bpy})$                                                                                                    | 0.54         |
| 18        | 34954                     | 0.002     | $\text{d}xz+\pi 1(\text{ppy}) \rightarrow \pi 2^*(\text{bpy})$<br>$\text{d}xz \rightarrow \pi 2^*(\text{bpy})$                                         | 0.28<br>0.28 |
| 19        | 35278                     | 0.069     | $\pi 5(\text{ppy}) \rightarrow \pi 1^*(\text{bpy})$<br>$\text{d}xz \rightarrow \pi 2^*(\text{ppy})$                                                    | 0.30<br>0.20 |
| 20        | 35634                     | 0.005     | $\pi 3(\text{ppy}) \rightarrow \pi 1^*(\text{bpy})$                                                                                                    | 0.48         |
| 21        | 35653                     | 0.130     | $\pi 1(\text{bpy}) \rightarrow \pi 1^*(\text{bpy})$<br>$\text{d}xz+\pi 1(\text{ppy}) \rightarrow \pi 3^*(\text{bpy})$                                  | 0.26<br>0.22 |
| 22        | 36274                     | 0.038     | $\text{d}yz \rightarrow \pi 3^*(\text{bpy})$                                                                                                           | 0.68         |
| 23        | 36520                     | 0.033     | $\pi 3(\text{ppy}) \rightarrow \pi 1^*(\text{ppy})$                                                                                                    | 0.40         |
| 24        | 36903                     | 0.016     | $\pi 3(\text{ppy}) \rightarrow \pi 2^*(\text{ppy})$                                                                                                    | 0.34         |
| 25        | 37318                     | 0.436     | $\pi 1(\text{bpy}) \rightarrow \pi 1^*(\text{bpy})$                                                                                                    | 0.34         |
| 26        | 38090                     | 0.255     | $\text{d}yz \rightarrow \pi 4^*(\text{ppy})$                                                                                                           | 0.68         |
| 27        | 38150                     | 0.000     | $\sigma(\text{d}xy) \rightarrow \pi 1^*(\text{bpy})$                                                                                                   | 0.58         |
| 28        | 38354                     | 0.014     | $\text{d}yz \rightarrow \pi 3^*(\text{ppy})$                                                                                                           | 0.76         |
| 29        | 38573                     | 0.187     | $\text{d}xz+\pi 1(\text{ppy}) \rightarrow \pi 3^*(\text{ppy})$                                                                                         | 0.50         |
| 30        | 38903                     | 0.195     | $\text{d}xz+\pi 1(\text{ppy}) \rightarrow \pi 4^*(\text{ppy})$                                                                                         | 0.40         |
| 31        | 39055                     | 0.001     | $\sigma(\text{d}z^2) \rightarrow \pi 1^*(\text{bpy})$                                                                                                  | 0.88         |
| 32        | 39574                     | 0.003     | $\text{d}xz \rightarrow \pi 2^*(\text{bpy})$                                                                                                           | 0.34         |
| 33        | 40364                     | 0.001     | $\text{dx}^2\text{-y}^2+\pi(\text{ppy}) \rightarrow \sigma^*(\text{d}z^2)$<br>$\text{dx}^2\text{-y}^2+\pi(\text{ppy}) \rightarrow \pi 6^*(\text{ppy})$ | 0.38<br>0.14 |
| 34        | 40416                     | 0.062     | $\text{d}xz \rightarrow \pi 3^*(\text{ppy})$                                                                                                           | 0.22         |

|    |       |       |                                                                                                                                                                                                                                               |                              |
|----|-------|-------|-----------------------------------------------------------------------------------------------------------------------------------------------------------------------------------------------------------------------------------------------|------------------------------|
|    |       |       | $\pi_3(\text{ppy}) \rightarrow \pi_2^*(\text{ppy})$                                                                                                                                                                                           | 0.20                         |
| 35 | 40462 | 0.012 | $\pi_5(\text{ppy}) \rightarrow \pi_2^*(\text{ppy})$<br>$\pi_3(\text{ppy}) \rightarrow \pi_1^*(\text{ppy})$                                                                                                                                    | 0.34<br>0.16                 |
| 36 | 40551 | 0.065 | $\pi_5(\text{ppy}) \rightarrow \pi_1^*(\text{ppy})$<br>$\text{dx}^2\text{-y}^2+\pi(\text{ppy}) \rightarrow \pi_5^*(\text{ppy})$                                                                                                               | 0.26<br>0.22                 |
| 37 | 40751 | 0.145 | $\text{dx}^2\text{-y}^2+\pi(\text{ppy}) \rightarrow \pi_5^*(\text{ppy})$<br>$\pi_5(\text{ppy}) \rightarrow \pi_2^*(\text{bpy})$                                                                                                               | 0.32<br>0.20                 |
| 38 | 41685 | 0.007 | $\pi_3(\text{ppy}) \rightarrow \pi_2^*(\text{bpy})$<br>$\sigma(\text{dxy}) \rightarrow \pi_1^*(\text{ppy})$<br>$\pi_5(\text{ppy}) \rightarrow \pi_3^*(\text{ppy})$                                                                            | 0.18<br>0.18<br>0.14         |
| 39 | 41821 | 0.002 | $\text{dxz} \rightarrow \pi_4^*(\text{ppy})$<br>$\sigma(\text{dxy}) \rightarrow \pi_1^*(\text{ppy})$                                                                                                                                          | 0.26<br>0.20                 |
| 40 | 41946 | 0.047 | $\text{dxz} \rightarrow \pi_3^*(\text{bpy})$                                                                                                                                                                                                  | 0.30                         |
| 41 | 41982 | 0.002 | $\sigma(\text{dxy}) \rightarrow \pi_1^*(\text{ppy})$<br>$\pi_3(\text{ppy}) \rightarrow \pi_2^*(\text{bpy})$                                                                                                                                   | 0.26<br>0.22                 |
| 42 | 42118 | 0.001 | $\sigma(\text{dz}^2) \rightarrow \pi_1^*(\text{ppy})$                                                                                                                                                                                         | 0.42                         |
| 43 | 42617 | 0.053 | $\pi_5(\text{ppy}) \rightarrow \pi_2^*(\text{bpy})$<br>$\pi_1(\text{bpy}) \rightarrow \pi_2^*(\text{bpy})$<br>$\text{dxz} \rightarrow \pi_3^*(\text{ppy})$                                                                                    | 0.20<br>0.18<br>0.08         |
| 44 | 42726 | 0.007 | $\pi_1(\text{bpy}) \rightarrow \pi_3^*(\text{bpy})$<br>$\pi_2(\text{bpy})+\pi(\text{ppy}) \rightarrow \pi_1^*(\text{bpy})$<br>$\pi_3(\text{ppy}) \rightarrow \pi_4^*(\text{ppy})$                                                             | 0.32<br>0.08<br>0.08         |
| 45 | 43063 | 0.037 | $\pi_1(\text{bpy}) \rightarrow \pi_2^*(\text{bpy})$<br>$\pi_5(\text{ppy}) \rightarrow \pi_2^*(\text{bpy})$                                                                                                                                    | 0.42<br>0.08                 |
| 46 | 43294 | 0.000 | $\text{dyz} \rightarrow \sigma^*(\text{dz}^2)$                                                                                                                                                                                                | 0.44                         |
| 47 | 43490 | 0.112 | $\text{dx}^2\text{-y}^2+\pi(\text{ppy}) \rightarrow \pi_4^*(\text{bpy})$<br>$\text{dx}^2\text{-y}^2+\pi(\text{ppy}) \rightarrow \pi_6^*(\text{ppy})$                                                                                          | 0.30<br>0.10                 |
| 48 | 43510 | 0.006 | $\text{dx}^2\text{-y}^2+\pi(\text{ppy}) \rightarrow \pi_4^*(\text{bpy})$<br>$\pi_3(\text{ppy}) \rightarrow \pi_3^*(\text{ppy})$<br>$\text{dx}^2\text{-y}^2+\pi(\text{ppy}) \rightarrow \pi_1^*(\text{bpy})$                                   | 0.14<br>0.12<br>0.08         |
| 49 | 43529 | 0.005 | $\text{dx}^2\text{-y}^2+\pi(\text{ppy}) \rightarrow \pi_4^*(\text{bpy})$<br>$\pi_3(\text{ppy}) \rightarrow \pi_3^*(\text{ppy})$<br>$\pi_1(\text{bpy}) \rightarrow \pi_3^*(\text{bpy})$<br>$\pi_3(\text{ppy}) \rightarrow \pi_4^*(\text{ppy})$ | 0.20<br>0.08<br>0.06<br>0.06 |
| 50 | 43593 | 0.004 | $\text{dxz}+\pi_1(\text{ppy}) \rightarrow \sigma^*(\text{dz}^2)$<br>$\text{dxz} \rightarrow \sigma^*(\text{dz}^2)$<br>$\text{dxz}+\pi_1(\text{ppy}) \rightarrow \pi_6^*(\text{ppy})$                                                          | 0.20<br>0.18<br>0.14         |
| 51 | 44068 | 0.007 | $\text{dx}^2\text{-y}^2+\pi(\text{ppy}) \rightarrow \pi_1^*(\text{bpy})$                                                                                                                                                                      | 0.50                         |
| 52 | 44550 | 0.041 | $\text{dx}^2\text{-y}^2+\pi(\text{ppy}) \rightarrow \sigma^*(\text{dxy})$<br>$\sigma(\text{dz}^2) \rightarrow \pi_1^*(\text{ppy})$<br>$\pi_3(\text{ppy}) \rightarrow \pi_3^*(\text{ppy})$                                                     | 0.16<br>0.14<br>0.14         |
| 53 | 44750 | 0.085 | $\sigma(\text{dz}^2) \rightarrow \pi_2^*(\text{ppy})$<br>$\sigma(\text{dxy}) \rightarrow \pi_2^*(\text{ppy})$<br>$\sigma(\text{dz}^2) \rightarrow \pi_1^*(\text{ppy})$                                                                        | 0.22<br>0.16<br>0.12         |

|    |       |       |                                                                                                                                                                                                                          |                                      |
|----|-------|-------|--------------------------------------------------------------------------------------------------------------------------------------------------------------------------------------------------------------------------|--------------------------------------|
| 54 | 44762 | 0.083 | $\sigma(dz_2) \rightarrow \pi_2^*(ppy)$<br>$\sigma(dxy) \rightarrow \pi_2^*(ppy)$<br>$\sigma(dz_2) \rightarrow \pi_1^*(ppy)$                                                                                             | 0.20<br>0.16<br>0.12                 |
| 55 | 44846 | 0.020 | $dx_2-y_2+\pi(ppy) \rightarrow \pi_6^*(ppy)$<br>$\sigma(dz_2) \rightarrow \pi_2^*(ppy)$                                                                                                                                  | 0.28<br>0.20                         |
| 56 | 45098 | 0.000 | $\pi_5(ppy) \rightarrow \pi_3^*(bpy)$                                                                                                                                                                                    | 0.38                                 |
| 57 | 45321 | 0.010 | $dyz \rightarrow \pi_5^*(ppy)$                                                                                                                                                                                           | 0.66                                 |
| 58 | 45685 | 0.006 | $\pi_3(ppy) \rightarrow \pi_3^*(bpy)$<br>$\sigma(dxy) \rightarrow \pi_3^*(bpy)$<br>$\pi_5(ppy) \rightarrow \pi_3^*(ppy)$<br>$\sigma(dxy) \rightarrow \pi_2^*(bpy)$                                                       | 0.16<br>0.12<br>0.08<br>0.08         |
| 59 | 45687 | 0.004 | $\pi_5(ppy) \rightarrow \pi_3^*(ppy)$<br>$\sigma(dxy) \rightarrow \pi_2^*(bpy)$<br>$\pi_3(ppy) \rightarrow \pi_2^*(bpy)$                                                                                                 | 0.14<br>0.12<br>0.10                 |
| 60 | 46088 | 0.002 | $dxz+\pi_1(ppy) \rightarrow \pi_5^*(ppy)$                                                                                                                                                                                | 0.44                                 |
| 61 | 46219 | 0.014 | $\sigma(dxy) \rightarrow \pi_3^*(bpy)$<br>$\pi_5(ppy) \rightarrow \pi_4^*(ppy)$<br>$dx_2-y_2+\pi(ppy) \rightarrow \pi_1^*(ppy)$                                                                                          | 0.18<br>0.16<br>0.08                 |
| 62 | 46561 | 0.001 | $\sigma(dz_2) \rightarrow \pi_2^*(bpy)$                                                                                                                                                                                  | 0.52                                 |
| 63 | 46758 | 0.003 | $\pi_3(ppy) \rightarrow \pi_4^*(ppy)$<br>$dxz \rightarrow \pi_5^*(ppy)$<br>$dx_2-y_2+\pi(ppy) \rightarrow \pi_7^*(ppy)$                                                                                                  | 0.24<br>0.10<br>0.06                 |
| 64 | 46794 | 0.004 | $\pi_3(ppy) \rightarrow \pi_3^*(ppy)$<br>$\sigma(dz_2) \rightarrow \pi_2^*(bpy)$                                                                                                                                         | 0.22<br>0.22                         |
| 65 | 46883 | 0.006 | $\pi_1(bpy) \rightarrow \pi_1^*(ppy)$                                                                                                                                                                                    | 0.86                                 |
| 66 | 46936 | 0.014 | $\pi_3(ppy) \rightarrow \pi_4^*(ppy)$<br>$\pi_5(ppy) \rightarrow \pi_3^*(ppy)$<br>$dx_2-y_2+\pi(ppy) \rightarrow \pi_7^*(ppy)$                                                                                           | 0.16<br>0.14<br>0.10                 |
| 67 | 47264 | 0.010 | $dyz \rightarrow \pi_4^*(bpy)$                                                                                                                                                                                           | 0.58                                 |
| 68 | 47391 | 0.004 | $dxz+\pi_1(ppy) \rightarrow \pi_4^*(bpy)$                                                                                                                                                                                | 0.36                                 |
| 69 | 47474 | 0.013 | $\pi_6(ppy) \rightarrow \pi_1^*(bpy)$<br>$\sigma(dxy) \rightarrow \pi_3^*(bpy)$                                                                                                                                          | 0.26<br>0.22                         |
| 70 | 47584 | 0.002 | $\pi_1(bpy) \rightarrow \pi_2^*(ppy)$                                                                                                                                                                                    | 0.64                                 |
| 71 | 47674 | 0.014 | $\pi_6(ppy) \rightarrow \pi_1^*(bpy)$<br>$dx_2-y_2+\pi(ppy) \rightarrow \pi_1^*(ppy)$<br>$\pi_7(ppy) \rightarrow \pi_2^*(ppy)$<br>$dx_2-y_2+\pi(ppy) \rightarrow \pi_2^*(bpy)$<br>$\sigma(dxy) \rightarrow \pi_3^*(bpy)$ | 0.16<br>0.12<br>0.06<br>0.06<br>0.06 |
| 72 | 47765 | 0.028 | $\pi_7(ppy) \rightarrow \pi_1^*(bpy)$                                                                                                                                                                                    | 0.26                                 |
| 73 | 47841 | 0.019 | $\pi_6(ppy) \rightarrow \pi_1^*(bpy)$<br>$dx_2-y_2+\pi(ppy) \rightarrow \pi_1^*(ppy)$                                                                                                                                    | 0.22<br>0.14                         |
| 74 | 47866 | 0.027 | $dyz \rightarrow \pi_6^*(ppy)$                                                                                                                                                                                           | 0.44                                 |
| 75 | 48104 | 0.004 | $\pi_7(ppy) \rightarrow \pi_1^*(bpy)$<br>$dyz \rightarrow \pi_6^*(ppy)$                                                                                                                                                  | 0.28<br>0.16                         |

|    |       |       |                                                                                                            |              |
|----|-------|-------|------------------------------------------------------------------------------------------------------------|--------------|
| 76 | 48422 | 0.026 | $\sigma(dz^2) \rightarrow \pi 3^*(bpy)$                                                                    | 0.58         |
| 77 | 48597 | 0.160 | $\pi 2(bpy) + \pi(\rho\rho y) \rightarrow \pi 1^*(bpy)$<br>$\pi 2(bpy) \rightarrow \pi 1^*(bpy)$           | 0.30<br>0.2  |
| 78 | 48668 | 0.017 | $\pi 6(\rho\rho y) \rightarrow \pi 1^*(\rho\rho y)$<br>$\pi 7(\rho\rho y) \rightarrow \pi 2^*(\rho\rho y)$ | 0.26<br>0.14 |
| 79 | 48889 | 0.002 | $\sigma(dxy) \rightarrow \pi 4^*(\rho\rho y)$<br>$\sigma(dz^2) \rightarrow \pi 3^*(bpy)$                   | 0.30<br>0.14 |
| 80 | 48903 | 0.004 | $\pi 3(bpy) \rightarrow \pi 1^*(bpy)$<br>$\pi 6(\rho\rho y) \rightarrow \pi 1^*(bpy)$                      | 0.32<br>0.12 |
